# Supplementary material
Source: PubMed Central journal article supplement (PMC7003455)
Supplement: rspb20192211supp1.pdf [file rspb20192211supp1.pdf]

## **Electronic supplement material: Appendix**

My niche: within-species individual spatial niche specialisation affects within and between species interactions

Annika Schirmer, Julia Hoffmann, Jana A. Eccard & Melanie Dammhahn

Animal Ecology, Institute for Biochemistry and Biology

University of Potsdam, Potsdam, Germany

### Corresponding author:

Annika Schirmer

Animal Ecology, Institute for Biochemistry and Biology

University of Potsdam

Maulbeerallee 1, 14469 Potsdam, Germany

++49 (0)331 977 1988 [annika.schirmer@uni-potsdam.de](mailto:annika.schirmer@uni-potsdam.de)

**Table A1:** Overview of the number of captured and recaptured individuals from the two study species (*M. glareolus*, *A. agrarius*) on each study site.

| Grid  | Captured individuals | Recaptured individuals |
|-------|----------------------|------------------------|
| G2    | 54                   | 48                     |
| G3    | 83                   | 80                     |
| G4    | 44                   | 29                     |
| G5    | 40                   | 29                     |
| G6    | 49                   | 41                     |
| Total | 270                  | 227                    |

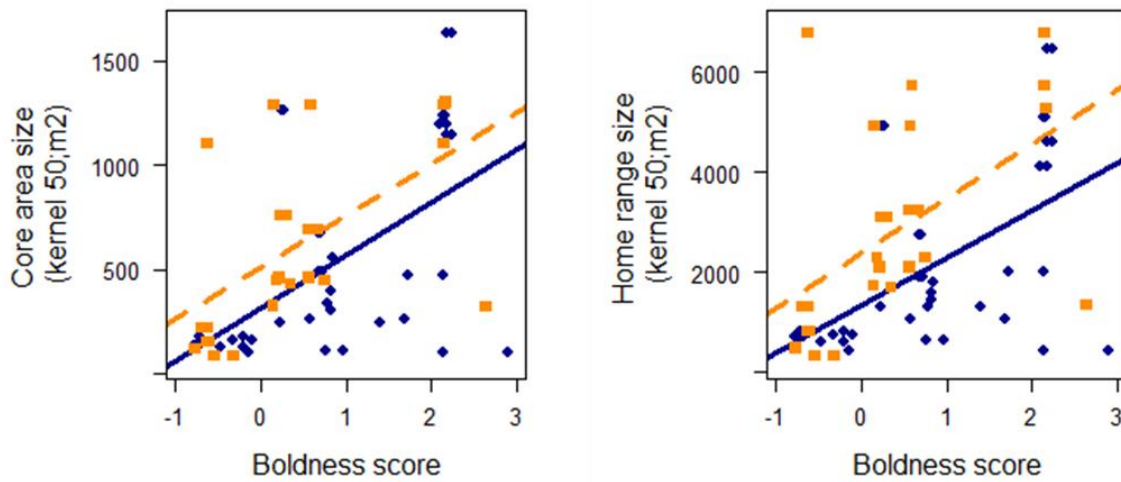

| Variable                    | Correlation coefficient | Co-variance | CI low       | CI high      |
|-----------------------------|-------------------------|-------------|--------------|--------------|
| Core area size (kernel 50)  | <b>0.49</b>             | <b>0.58</b> | <b>0.299</b> | <b>0.801</b> |
| Home range size (kernel 95) | <b>0.47</b>             | <b>0.60</b> | <b>0.278</b> | <b>0.816</b> |

**Figure A1** Covariance of boldness and home range and core area size respectively for *M. glareolus* (n = 21, blue solid line and dots) and *A. agrarius* (n = 15, orange dashed line and squares) tracked via automated VHF telemetry. Home ranges are based on 95 % of location points, core areas on 50 % of location points. Represented are covariance values and credibility intervals, as well as correlation coefficients to represent the strength of association between variables. Intervals different from zero represent significant covariances and are marked in bold.

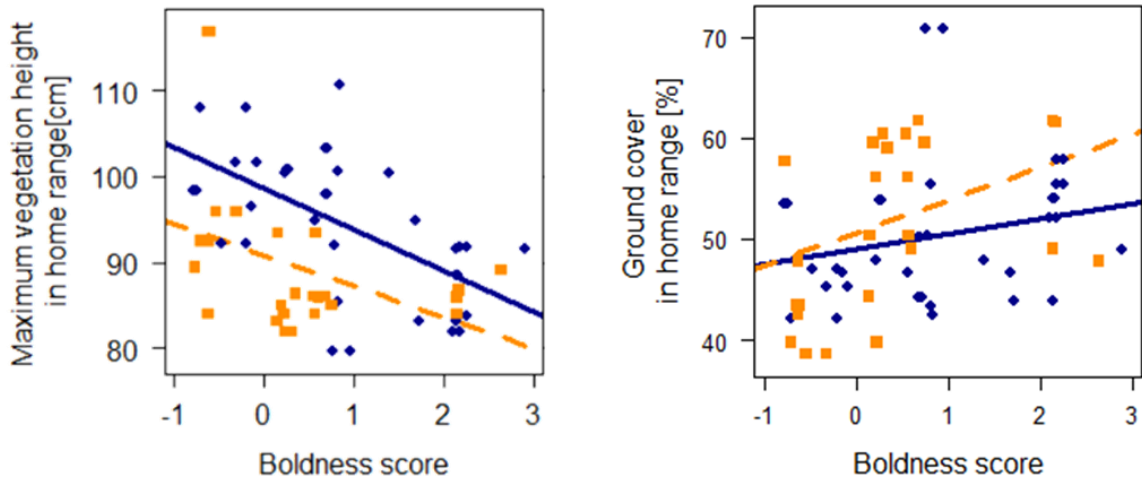

| Variable                                | Correlation coefficient | Co-variance  | CI low        | CI high       |
|-----------------------------------------|-------------------------|--------------|---------------|---------------|
| Maximum vegetation height in home range | -0.40                   | <b>-0.57</b> | <b>-0.787</b> | <b>-0.211</b> |
| Ground cover in home range              | <b>0.32</b>             | <b>0.18</b>  | <b>0.025</b>  | <b>0.751</b>  |

**Figure A2** Covariance between boldness and microhabitat structure in home ranges of bank voles (*M. glareolus*, solid line and circles) and striped field mice (*A. agrarius*, dashed line and squares). We measured the maximum vegetation height (in cm) and estimated the percentage of ground cover (10 cm above ground) based on photographs in one square meter surrounding each trap location. Using QGIS we interpolated maximum vegetation height and percentage of ground cover on the basis of an inverse weighing of the distance between points to assess habitat characteristics for the whole area of the trapping grid. Subsequently, we extracted maximum vegetation height and vegetation cover from these GIS models for each simulated location point within individual home ranges and core areas (for more details see Schirmer et al. 2019). Represented are covariance values and credibility intervals, as well as correlation coefficients to represent the strength of association between variables. Intervals different from zero represent significant covariances and are marked in bold.

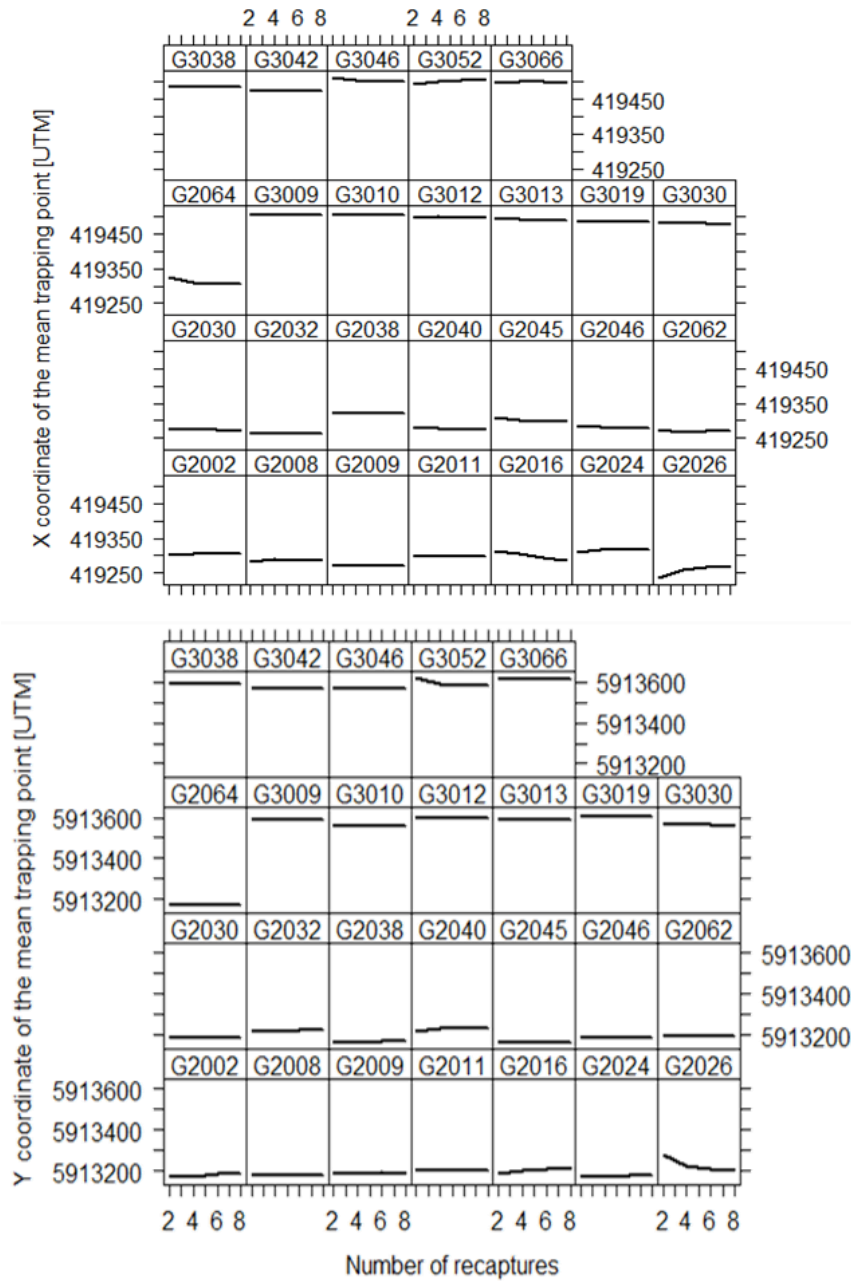

| Variable                            | Factor         | $\chi^2$ | Df | p-value |
|-------------------------------------|----------------|----------|----|---------|
| X coordinate of mean trapping point | No. Recaptures | 1.50     | 1  | 0.220   |
| Y coordinate of mean trapping point | No. Recaptures | 0.52     | 1  | 0.473   |

**Figure A3** | X and Y coordinates of mean trapping points in dependence of the number of recaptures for a subset of individuals ( $n = 26$ ) which were trapped 8 times. Neither coordinate was significantly dependent on the number of recaptures of individuals based on calculated generalised linear mixed-effects models.

**Table A2** Repeatability of behavioural variables quantified in a combined open-field and dark-light test for *M. glareolus* (n = 62) and *A. agrarius* (n = 44). R stands for the repeatability coefficient, CI\_low represents the lower 95% confidence interval, CI\_high the upper 95% confidence interval and SE the standard error. Repeatabilities different from zero are indicated in bold.

|                          | Variable                    | R           | CI low      | CI high     | p-value      |
|--------------------------|-----------------------------|-------------|-------------|-------------|--------------|
| <i>Myodes glareolus</i>  | Latency to investigate      | <b>0.45</b> | <b>0.17</b> | <b>0.69</b> | <b>0.001</b> |
|                          | Latency to emerge           | <b>0.37</b> | <b>0.11</b> | <b>0.61</b> | <b>0.003</b> |
|                          | Latency to cross the center | <b>0.33</b> | <b>0.00</b> | <b>0.58</b> | <b>0.007</b> |
|                          | Number of center crossings  | <b>0.26</b> | <b>0.00</b> | <b>0.42</b> | <b>0.007</b> |
|                          | Number of sections entered  | <b>0.22</b> | <b>0.05</b> | <b>0.46</b> | <b>0.026</b> |
|                          | Number of jumps             | 0.08        | -0.11       | 0.33        | 0.158        |
|                          | Activity                    | <b>0.33</b> | <b>0.12</b> | <b>0.54</b> | <b>0.009</b> |
| <i>Apodemus agrarius</i> | Latency to investigate      | <b>0.41</b> | <b>0.18</b> | <b>0.60</b> | <b>0.001</b> |
|                          | Latency to emerge           | <b>0.43</b> | <b>0.17</b> | <b>0.63</b> | <b>0.001</b> |
|                          | Latency to cross the center | <b>0.16</b> | <b>0.00</b> | <b>0.28</b> | <b>0.013</b> |
|                          | Number of center crossings  | <b>0.21</b> | <b>0.10</b> | <b>0.37</b> | <b>0.028</b> |
|                          | Number of sections entered  | <b>0.31</b> | <b>0.00</b> | <b>0.38</b> | <b>0.002</b> |
|                          | Number of jumps             | 0.22        | -0.21       | 0.39        | 0.059        |
|                          | Activity                    | <b>0.37</b> | <b>0.07</b> | <b>0.66</b> | <b>0.036</b> |

**Table A3** Results of the principle component analysis, corrected for species, for *M. glareolus* and *A. agrarius* (n = 126). PC 1 represents the principle component interpreted as exploration, PC 2 represents the component interpreted as boldness. The highest loading of each variable, signifying which component represents the variable best, is marked in bold.

|                     |                             | Components   |             |
|---------------------|-----------------------------|--------------|-------------|
|                     |                             | PC 1         | PC 2        |
| <b>Loadings</b>     | Latency to investigate      | -0.58        | <b>0.77</b> |
|                     | Latency to emerge           | -0.59        | <b>0.76</b> |
|                     | Latency to cross the center | <b>-0.74</b> | -0.35       |
|                     | Number of center crossings  | <b>0.78</b>  | 0.24        |
|                     | Number of sections entered  | <b>0.85</b>  | 0.28        |
|                     | Activity                    | <b>0.76</b>  | 0.27        |
|                     | <b>Variance</b>             | Eigenvalues  | 3.15        |
| Proportion Variance |                             | 0.56         | 0.27        |
| Cumulative Variance |                             | 0.56         | 0.83        |

**Table A4** Covariances between exploration and the respective spatial interaction variables. Represented are the covariance values, their credibility intervals and the correlation coefficients to represent the strength of association between variables.

| <b>Variable</b>                                | <b>Correlation coefficient</b> | <b>Co-variance</b> | <b>CI low</b> | <b>CI high</b> |
|------------------------------------------------|--------------------------------|--------------------|---------------|----------------|
| Intraspecific overlap of core areas            | 0.04                           | 0.15               | -0.383        | 0.528          |
| Intraspecific overlap of home ranges           | 0.10                           | 0.14               | -0.241        | 0.475          |
| No. of conspecific neighbours in core area     | 0.21                           | 0.31               | -0.428        | 0.652          |
| No. of conspecific neighbours in home range    | -0.01                          | 0.13               | -0.450        | 0.590          |
| Distance to the nearest conspecific            | -0.21                          | -0.64              | -0.835        | 0.196          |
| Interspecific overlap of core areas            | 0.05                           | -0.05              | -0.458        | 0.378          |
| Interspecific overlap of home ranges           | 0.18                           | 0.10               | -0.269        | 0.444          |
| No. of heterospecific neighbours in core area  | -0.10                          | 0.03               | -0.534        | 0.529          |
| No. of heterospecific neighbours in home range | -0.09                          | -0.09              | -0.660        | 0.426          |
| Distance to the nearest heterospecific         | -0.17                          | -0.15              | -0.754        | 0.325          |

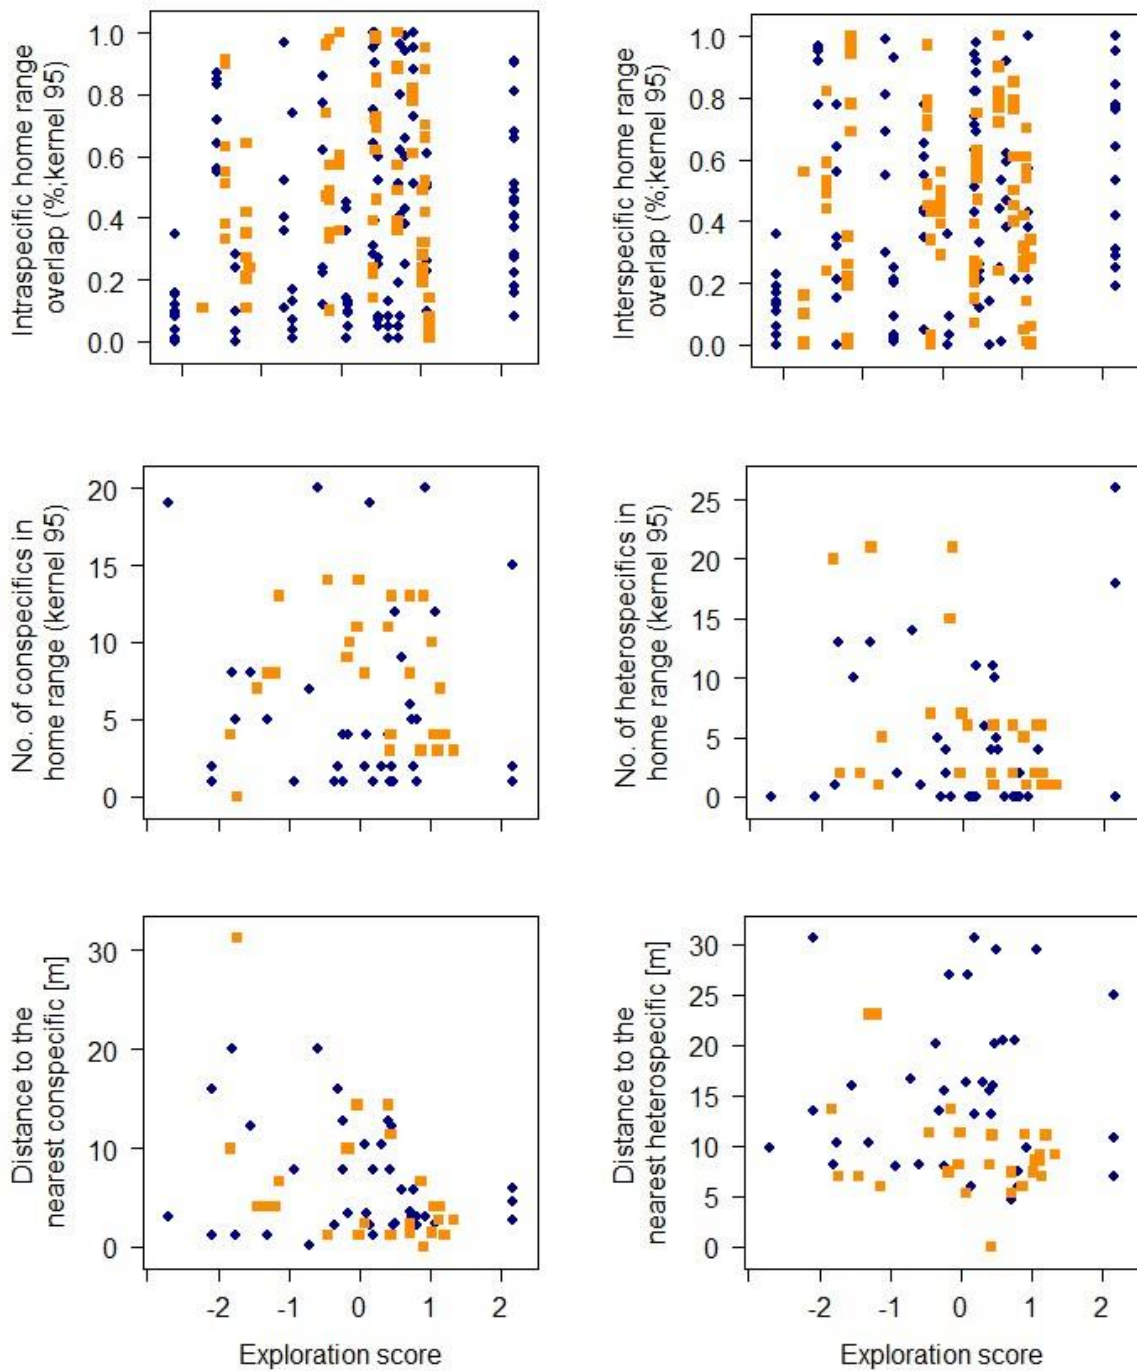

**Figure A4** Covariance between exploration and spatial patterns at the home range scale. Presented are intra- and interspecific overlap, number of con- and heterospecific neighbours and the distance to the nearest con- or heterospecific of bank voles (*M. glareolus*,  $n = 21$ , dots) and striped field mice (*A. agrarius*,  $n = 15$ , squares). Results on the core area scale are similar, we therefore refrain from presenting them.

**Table A5** Results for the fixed effects of Bayesian mixed-effects models on spatial patterns in home ranges (kernel 95) and core areas (kernel 50) of bank voles and striped field mice. Represented are the mean values for the variables based on the posterior distribution of the data, the lower and upper level of the 95 % credibility interval (CI) the effective sample size based on permutations and the adjusted p values based on Bayesian statistics.

| <b>Variable</b>                               | <b>Fixed factor</b> | <b>Post.mean</b> | <b>Lower CI 95%</b> | <b>Upper CI 95%</b> | <b>Eff.samp</b> | <b>pMCMC</b> |
|-----------------------------------------------|---------------------|------------------|---------------------|---------------------|-----------------|--------------|
| Intraspecific overlap of core areas           | Sex                 | 0.136            | -0.051              | 0.300               | 1000            | 0.112        |
|                                               | Species             | -0.007           | -0.205              | 0.186               | 1214            | 0.950        |
|                                               | Dif_Bold            | 0.000            | -0.001              | 0.001               | 1000            | 0.956        |
|                                               | DyadSex             | 0.000            | -0.005              | 0.007               | 698             | 0.912        |
| Intraspecific overlap of home range           | Sex                 | 0.103            | -0.113              | 0.309               | 1000            | 0.344        |
|                                               | Species             | 0.072            | -0.152              | 0.306               | 1000            | 0.516        |
|                                               | Dif_Bold            | 0.000            | -0.001              | 0.001               | 1000            | 0.872        |
|                                               | DyadSex             | 0.001            | -0.006              | 0.007               | 1000            | 0.836        |
| Interspecific overlap of core areas           | Sex                 | -0.001           | -0.169              | 0.171               | 1000            | 0.992        |
|                                               | Species             | 0.045            | -0.109              | 0.232               | 1000            | 0.604        |
|                                               | Dif_Bold            | 0.000            | -0.001              | 0.001               | 1000            | 0.960        |
|                                               | DyadSex             | 0.000            | -0.006              | 0.006               | 1000            | 0.990        |
| Interspecific overlap of home range           | Sex                 | -0.036           | -0.265              | 0.199               | 1000            | 0.750        |
|                                               | Species             | 0.026            | -0.204              | 0.241               | 1000            | 0.822        |
|                                               | Dif_Bold            | 0.000            | -0.001              | 0.001               | 1000            | 0.824        |
|                                               | DyadSex             | 0.001            | -0.006              | 0.007               | 1000            | 0.790        |
| No of conspecific neighbours in core area     | Sex                 | -0.294           | -0.794              | 0.252               | 1000            | 0.292        |
|                                               | Species             | -0.161           | -0.675              | 0.401               | 1000            | 0.538        |
| No of conspecific neighbours in home range    | Sex                 | 0.119            | -0.516              | 0.710               | 1000            | 0.682        |
|                                               | Species             | 0.456            | -0.190              | 1.063               | 1000            | 0.132        |
| No of heterospecific neighbours in core area  | Sex                 | -0.009           | -0.754              | 0.707               | 1000            | 0.980        |
|                                               | Species             | -0.077           | -0.879              | 0.701               | 1000            | 0.852        |
| No of heterospecific neighbours in home range | Sex                 | 0.335            | -0.798              | 1.390               | 1000            | 0.528        |
|                                               | Species             | 0.424            | -0.527              | 1.390               | 1000            | 0.434        |
| Distance to the nearest conspecific           | Sex                 | -0.930           | -3.138              | 1.689               | 1000            | 0.424        |
|                                               | Species             | -0.104           | -2.280              | 2.194               | 1000            | 0.920        |
|                                               | DyadSex             | -0.056           | -0.345              | 0.223               | 1000            | 0.738        |
| Distance to the nearest heterospecific        | Sex                 | 0.608            | -2.006              | 3.399               | 1000            | 0.630        |
|                                               | Species             | -2.395           | -4.933              | 0.207               | 1000            | 0.076        |
|                                               | DyadSex             | -0.012           | -0.296              | 0.307               | 1000            | 0.896        |



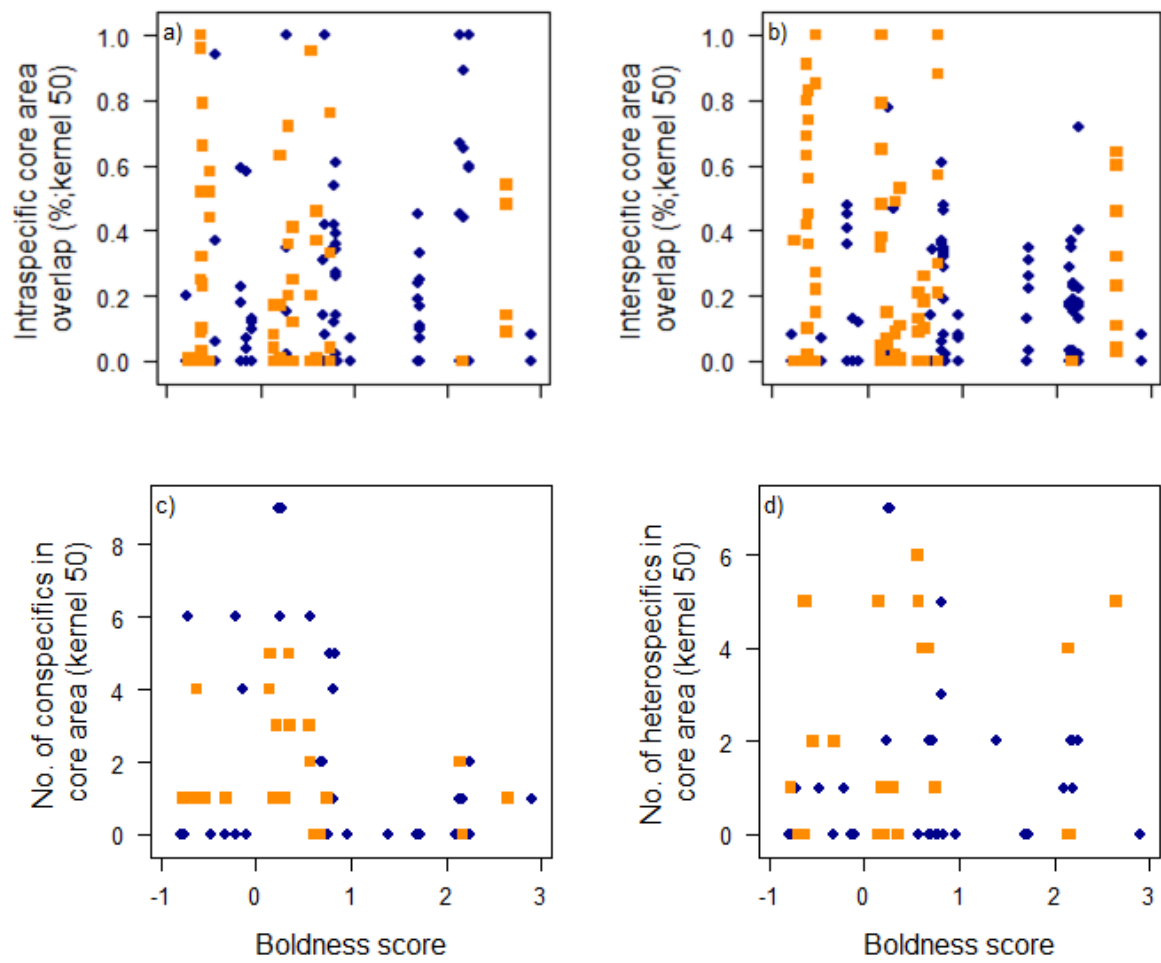

**Figure A5** Covariance between boldness and spatial patterns at the core area scale. Presented are intra- and interspecific overlap (a, b) and number of con- and heterospecific neighbours (c, d) of bank voles (*M. glareolus*,  $n = 21$ , dots) and striped field mice (*A. agrarius*,  $n = 15$ , squares).

**Table A6** Descriptive statistic of spatial variables for bank voles (BV) and striped field mice (SFM). Given are mean, SD as the standard deviation, Min the minimum and Max the maximum value.

| <b>Variable</b>                                   | <b>Species</b> | <b>Mean</b> | <b>SD</b> | <b>Min</b> | <b>Max</b> |
|---------------------------------------------------|----------------|-------------|-----------|------------|------------|
| Interspecific overlap of home ranges              | BV             | 0.48        | 0.30      | 0.10       | 1.00       |
|                                                   | SFM            | 0.48        | 0.26      | 0.10       | 1.00       |
| Intraspecific overlap of home ranges              | BV             | 0.40        | 0.14      | 0.12       | 0.65       |
|                                                   | SFM            | 0.49        | 0.21      | 0.11       | 0.94       |
| Heterospecific number of neighbours in core area  | BV             | 5.52        | 7.24      | 0.00       | 26.00      |
|                                                   | SFM            | 6.47        | 6.76      | 1.00       | 21.00      |
| Conspecific number of neighbours in home range    | BV             | 6.05        | 5.89      | 1.00       | 20.00      |
|                                                   | SFM            | 7.33        | 4.35      | 0.00       | 14.00      |
| Interspecific overlap of core areas               | BV             | 0.24        | 0.18      | 0.10       | 0.78       |
|                                                   | SFM            | 0.36        | 0.30      | 0.10       | 1.00       |
| Intraspecific overlap of core areas               | BV             | 0.17        | 0.10      | 0.00       | 0.48       |
|                                                   | SFM            | 0.19        | 0.18      | 0.00       | 0.57       |
| Heterospecific number of neighbours in home range | BV             | 1.24        | 1.87      | 0.00       | 7.00       |
|                                                   | SFM            | 2.27        | 2.28      | 0.00       | 6.00       |
| Conspecific number of neighbours in core area     | BV             | 2.19        | 2.69      | 0.00       | 9.00       |
|                                                   | SFM            | 1.73        | 1.44      | 0.00       | 5.00       |
| Distance to nearest conspecific                   | BV             | 7.00        | 6.10      | 0.00       | 31.20      |
|                                                   | SFM            | 8.26        | 10.77     | 0.00       | 55.07      |
| Distance to nearest heterospecific                | BV             | 14.60       | 8.82      | 0.00       | 33.71      |
|                                                   | SFM            | 12.34       | 10.75     | 0.00       | 58.53      |

**Table A7** Covariances of single variables comprising the boldness score in the manuscript and spatial interaction variables. We decided to use the PCA scores of the second component as a quantitative measure of boldness in the Bayesian mixed-effects models presented in the manuscript, rather than the single measured variables from the individual difference test, since the test itself measures six variables and picking one of them as a measure of boldness would neglect the underlying grouping structure of the data. Therefore, we present the covariances between the single variables and the spatial variables only here. Latency to investigate represents the latency until an individual stuck its head out of the pipe from the test set up, while the latency to emerge represents the latency until an individual left the pipe with its whole body. Represented are the covariance values their credibility intervals and the correlation coefficients to represent the strength of association between variables. Intervals different from zero represent significant covariances and are marked in bold.

|                        | Variable                                       | Correlation coefficient | Co-variance  | CI low        | CI high       |
|------------------------|------------------------------------------------|-------------------------|--------------|---------------|---------------|
| Latency to investigate | Intraspecific overlap of core areas            | 0.12                    | 0.23         | -0.197        | 0.689         |
|                        | Intraspecific overlap of home ranges           | 0.22                    | 0.29         | -0.004        | 0.677         |
|                        | No. of conspecific neighbours in core area     | -0.12                   | -0.28        | -0.651        | 0.283         |
|                        | No. of conspecific neighbours in home range    | <b>-0.07</b>            | <b>-0.10</b> | <b>-0.599</b> | <b>-0.048</b> |
|                        | Distance to the nearest conspecific            | <b>0.21</b>             | <b>0.42</b>  | <b>0.009</b>  | <b>0.726</b>  |
|                        | Interspecific overlap of core areas            | 0.00                    | 0.00         | -0.389        | 0.476         |
|                        | Interspecific overlap of home ranges           | <b>0.22</b>             | <b>0.46</b>  | <b>0.069</b>  | <b>0.693</b>  |
|                        | No. of heterospecific neighbours in core area  | -0.07                   | -0.15        | -0.501        | 0.505         |
|                        | No. of heterospecific neighbours in home range | <b>0.31</b>             | <b>0.37</b>  | <b>0.192</b>  | <b>0.789</b>  |
|                        | Distance to the nearest heterospecific         | <b>-0.21</b>            | <b>-0.28</b> | <b>-0.667</b> | <b>-0.017</b> |
| Latency to emerge      | Intraspecific overlap of core areas            | 0.06                    | 0.12         | -0.272        | 0.491         |
|                        | Intraspecific overlap of home ranges           | 0.13                    | 0.17         | -0.134        | 0.578         |
|                        | No. of conspecific neighbours in core area     | -0.05                   | -0.11        | -0.634        | 0.274         |
|                        | No. of conspecific neighbours in home range    | <b>-0.06</b>            | <b>-0.08</b> | <b>-0.554</b> | <b>-0.047</b> |
|                        | Distance to the nearest conspecific            | <b>0.19</b>             | <b>0.38</b>  | <b>0.005</b>  | <b>0.754</b>  |
|                        | Interspecific overlap of core areas            | -0.06                   | -0.12        | -0.334        | 0.410         |
|                        | Interspecific overlap of home ranges           | <b>0.12</b>             | <b>0.25</b>  | <b>0.027</b>  | <b>0.606</b>  |
|                        | No. of heterospecific neighbours in core area  | 0.02                    | 0.04         | -0.395        | 0.508         |
|                        | No. of heterospecific neighbours in home range | <b>0.24</b>             | <b>0.28</b>  | <b>0.039</b>  | <b>0.699</b>  |
|                        | Distance to the nearest heterospecific         | <b>-0.20</b>            | <b>-0.27</b> | <b>-0.672</b> | <b>-0.005</b> |

**A13** Exemplary R code of a calculated Bayesian mixed model investigating the covariance between boldness and spatial parameters

```
##MCMC model: Covariance between boldness and distance to the nearest conspecific
library(MCMCglmm)

##Load data
DataDis <- read.delim2("C:/.../DataDistance.txt")

#set priors
##create matrix variances of both covariates
pvar1<-matrix(c(var(DataDis$Boldness,na.rm=TRUE),0,0, var(DataDis$DistanceConspecific, na.rm=TRUE)), 2,2)
```

```
##the distance to the nearest conspecific has only been measured once, therefore the within-individual correlation is fixed to nearly 0
```

```
prior1<-list(G=list(G1=list(V=diag(2)*pvar1/2,n=2),G2=list(V=diag(2)*pvar1/2,n=2)),  
R=list(V=diag(c(1,0.0001),2,2),nu=1,fix=2))
```

```
#Run MCMC model
```

```
##Boldness and the distance to the nearest conspecific have not been measured at the same time, therefore the within-individual covariance was fixed to 0
```

```
mod.Dis<-MCMCglmm(cbind(Boldness,DistanceConspecific)~ trait-  
1+Sex+Species,random=~us(trait):PIT+us(trait):Grid, rcov=~idh(trait):units,  
family=c("gaussian","gaussian"),data=DataDis, nitt=101000, thin=100, burnin=1000, prior=prior1, verbose=FALSE)
```

```
summary(mod.Dis)
```

```
autocorr(mod.Dis$VCV)
```

```
plot(mod.Dis$VCV)
```

```
plot(mod.Dis$Sol)
```

```
posterior.mode(mod.Dis$VCV)
```

```
mod.Dis$DIC
```

```
head(mod.Dis$Sol)
```

```
#calculation of among-individual correlations
```

```
CorDis<-
```

```
mod.Dis$VCV[,"traitDistanceConspecific:traitBoldness.PIT"]/sqrt(mod.Dis$VCV[,"traitBoldness:traitBoldness.PIT"]  
*mod.Dis$VCV[,"traitDistanceConspecific:traitDistanceConspecific.PIT"])
```

```
#extract covariance and credibility interval
```

```
posterior.mode(CorDis)
```

```
HPDinterval(CorDis, 0.95)
```
